# Supplementary material for: Synthesis of closo- and nido-biscarboranes with rigid unsaturated linkers as precursors to linear metallacarborane-based molecular rods
Source: Royal Society of Chemistry journal article supplement (doi:10.1039/c3dt52596a), 2013-10-18
Supplement: c3dt52596a.pdf [file c3dt52596a.pdf]

## SUPPLEMENTARY INFORMATION FOR

### **Synthesis of *closo*- and *nido*-Biscarboranes with Rigid Unsaturated Linkers as Precursors to Linear Metallocarborane-Based Molecular Rods**

Alexander V. Safronov,<sup>a</sup> Yulia V. Sevryugina,<sup>a</sup> Kothanda Rama L. Pichaandi,<sup>b</sup> Satish S. Jalisatgi,<sup>a</sup> and M. Frederick Hawthorne<sup>a,\*</sup>

<sup>a</sup>International Institute of Nano and Molecular Medicine (I<sup>2</sup>NM<sup>2</sup>), University of Missouri, Columbia, MO 65211, USA.

<sup>b</sup>Present address: Department of Chemistry and Energy Center, Purdue University, 560 Oval Drive West Lafayette, IN 47907, USA.

**Table S1.** Crystallographic details for **3**, **6**, **9**, **14**, **15**, and **17**.

| compound                                                                        | <b>3</b>                                       | <b>6</b>                                        | <b>9</b>                                                        | <b>14</b>                                      | <b>15</b>                                                      | <b>17</b>                                                      |
|---------------------------------------------------------------------------------|------------------------------------------------|-------------------------------------------------|-----------------------------------------------------------------|------------------------------------------------|----------------------------------------------------------------|----------------------------------------------------------------|
| empirical formula                                                               | C <sub>6</sub> H <sub>22</sub> B <sub>20</sub> | C <sub>10</sub> H <sub>26</sub> B <sub>20</sub> | C <sub>15</sub> H <sub>27</sub> B <sub>20</sub> Cl <sub>3</sub> | C <sub>8</sub> H <sub>22</sub> B <sub>20</sub> | C <sub>38</sub> H <sub>94</sub> B <sub>18</sub> N <sub>2</sub> | C <sub>46</sub> H <sub>98</sub> B <sub>18</sub> N <sub>2</sub> |
| Fw                                                                              | 310.44                                         | 362.51                                          | 529.92                                                          | 334.46                                         | 773.73                                                         | 873.84                                                         |
| crystal size (mm <sup>3</sup> )                                                 | 0.26 × 0.16 × 0.14                             | 0.20 × 0.14 × 0.10                              | 0.86 × 0.20 × 0.16                                              | 0.42 × 0.26 × 0.22                             | 0.36 × 0.06 × 0.06                                             | 0.36 × 0.22 × 0.18                                             |
| crystal system                                                                  | orthorhombic                                   | monoclinic                                      | monoclinic                                                      | monoclinic                                     | monoclinic                                                     | monoclinic                                                     |
| space group                                                                     | <i>Pnn2</i>                                    | <i>P2<sub>1</sub>/c</i>                         | <i>P2<sub>1</sub>/c</i>                                         | <i>P2<sub>1</sub>/n</i>                        | <i>P2<sub>1</sub>/c</i>                                        | <i>P2<sub>1</sub>/n</i>                                        |
| <i>a</i> (Å)                                                                    | 11.4869(10)                                    | 7.1373(5)                                       | 23.4549(9)                                                      | 6.7200(8)                                      | 14.8236(17)                                                    | 10.9742(16)                                                    |
| <i>b</i> (Å)                                                                    | 11.6934(11)                                    | 11.1008(8)                                      | 11.1387(4)                                                      | 12.6135(15)                                    | 18.229(2)                                                      | 15.710(2)                                                      |
| <i>c</i> (Å)                                                                    | 6.8962(6)                                      | 13.1767(10)                                     | 23.2584(9)                                                      | 12.0553(14)                                    | 19.262(2)                                                      | 16.935(3)                                                      |
| <i>β</i> (deg)                                                                  |                                                | 92.339(1)                                       | 111.488(2)                                                      | 100.506(2)                                     | 100.120(2)                                                     | 90.556(3)                                                      |
| <i>V</i> (Å <sup>3</sup> )                                                      | 926.30(14)                                     | 1043.12(13)                                     | 5654.1(4)                                                       | 1004.7(2)                                      | 5124.1(10)                                                     | 2919.7(7)                                                      |
| <i>Z</i>                                                                        | 2                                              | 2                                               | 8                                                               | 2                                              | 4                                                              | 2                                                              |
| <i>T</i> (K)                                                                    | 173(2)                                         | 173(2)                                          | 173(2)                                                          | 173(2)                                         | 173(2)                                                         | 173(2)                                                         |
| <i>λ</i> (Å)                                                                    | 0.71073                                        | 0.71073                                         | 0.71073                                                         | 0.71073                                        | 0.71073                                                        | 0.71073                                                        |
| <i>d</i> <sub>calc</sub> (g·cm <sup>-3</sup> )                                  | 1.113                                          | 1.154                                           | 1.245                                                           | 1.106                                          | 1.003                                                          | 0.994                                                          |
| <i>μ</i> (mm <sup>-1</sup> )                                                    | 0.046                                          | 0.051                                           | 0.333                                                           | 0.047                                          | 0.051                                                          | 0.051                                                          |
| <i>θ</i> <sub>max</sub> (deg)                                                   | 27.14                                          | 25.00                                           | 29.91                                                           | 27.13                                          | 25.00                                                          | 27.12                                                          |
| unique data                                                                     | 7733                                           | 7616                                            | 51767                                                           | 8555                                           | 49669                                                          | 25157                                                          |
| observed data [ <i>I</i> > 2σ( <i>I</i> )]                                      | 996                                            | 1400                                            | 8798                                                            | 1753                                           | 3826                                                           | 3048                                                           |
| parameters                                                                      | 162                                            | 162                                             | 930                                                             | 171                                            | 682                                                            | 383                                                            |
| GOF <sup>a</sup> on <i>F</i> <sup>2</sup>                                       | 1.189                                          | 1.057                                           | 1.040                                                           | 1.079                                          | 1.001                                                          | 1.048                                                          |
| <i>R</i> 1 <sup>b</sup> , <i>wR</i> 2 <sup>c</sup> [ <i>I</i> > 2σ( <i>I</i> )] | 0.0687, 0.1714                                 | 0.0489, 0.1145                                  | 0.0582, 0.1481                                                  | 0.0518, 0.1354                                 | 0.0770, 0.1491                                                 | 0.0702, 0.1771                                                 |
| <i>R</i> 1 <sup>b</sup> , <i>wR</i> 2 <sup>c</sup> (all data)                   | 0.0760, 0.1791                                 | 0.0713, 0.1257                                  | 0.1176, 0.1800                                                  | 0.0650, 0.1443                                 | 0.1974, 0.2024                                                 | 0.1580, 0.2187                                                 |
| Δρ <sub>max,min</sub> (e·Å <sup>-3</sup> )                                      | 0.473, -0.202                                  | 0.205, -0.199                                   | 0.530, -0.384                                                   | 0.283, -0.107                                  | 0.216, -0.289                                                  | 0.444, -0.139                                                  |
| <i>T</i> <sub>min</sub> / <i>T</i> <sub>max</sub>                               | 0.75 / 0.99                                    | 0.75 / 0.99                                     | 0.76 / 0.95                                                     | 0.71 / 0.99                                    | 0.67 / 0.75                                                    | 0.81 / 0.99                                                    |

<sup>a</sup> GOF = [Σ[w(*F*<sub>o</sub><sup>2</sup> - *F*<sub>c</sub><sup>2</sup>)<sup>2</sup>]/(N<sub>obs</sub> - N<sub>params</sub>)]<sup>1/2</sup>. <sup>b</sup> *R*1 = Σ||*F*<sub>o</sub>| - |*F*<sub>c</sub>||/Σ|*F*<sub>o</sub>|. <sup>c</sup> *wR*2 = [Σ[w(*F*<sub>o</sub><sup>2</sup> - *F*<sub>c</sub><sup>2</sup>)<sup>2</sup>]/Σ[w(*F*<sub>o</sub><sup>2</sup>)<sup>2</sup>]]<sup>1/2</sup>.

**Table S2.** Selected bond distances (Å) and angles (°) in **3**, **6**, **9**, **14**, **15**, and **17**.

|                                                  | <b>3</b> | <b>6</b>                         | <b>9</b>                                                                                                                                     | <b>14</b>  | <b>15</b>              | <b>17</b>                        |
|--------------------------------------------------|----------|----------------------------------|----------------------------------------------------------------------------------------------------------------------------------------------|------------|------------------------|----------------------------------|
| B–C                                              | 1.527(5) | 1.584(3)                         | 1.542(3)<br>1.544(3)<br>1.545(3)<br>1.545(3)                                                                                                 | 1.5450(16) | 1.552(12)<br>1.553(12) | 1.550(4)                         |
| C≡C                                              | 1.220(7) | -                                | 1.195(2)<br>1.200(2)<br>1.200(2)<br>1.200(3)                                                                                                 | 1.2051(16) | 1.215(10)              | 1.190(3)                         |
| C <sub>arom</sub> –C <sub>arom</sub>             | -        | 1.392(2)<br>1.396(2)<br>1.397(2) | 1.395(3)<br>1.388(3)<br>1.388(3)<br>1.389(3)<br>1.381(3)<br>1.384(3)<br>1.390(3)<br>1.396(2)<br>1.384(2)<br>1.396(2)<br>1.389(3)<br>1.387(2) | -          | -                      | 1.386(4)<br>1.380(4)<br>1.375(4) |
| B–C <sub>B</sub> ≡C <sub>X</sub>                 | 174.2(2) | -                                | 177.4(2)<br>177.8(2)<br>176.1(2)<br>178.4(2)                                                                                                 | 178.74(14) | 177.9(8)               | 178.7(3)                         |
| C <sub>B</sub> ≡C <sub>X</sub> –X,<br>X = B or C | 174.2(2) | -                                | 178.1(2)<br>178.4(2)<br>177.3(2)<br>177.8(3)                                                                                                 | 179.38(17) | 178.8(8)               | 178.9(3)                         |
